# Supplementary material
Source: PubMed Central journal article supplement (PMC4145133)
Supplement: supp_tpc.114.126441_tpc126441_Supplemental.pdf [file supp_tpc.114.126441_tpc126441_Supplemental.pdf]

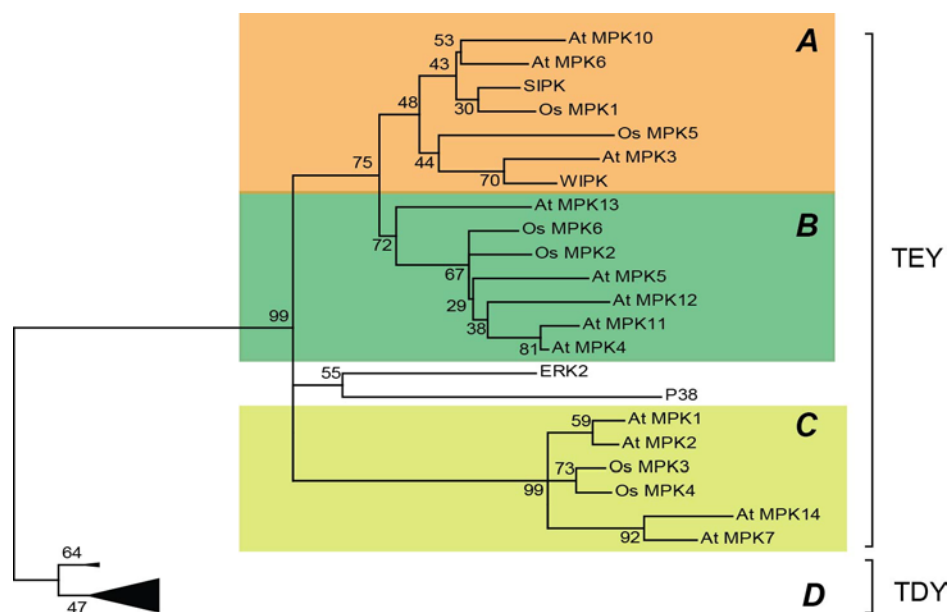

**Supplemental Figure 1. The phylogenetic tree of rice and *Arabidopsis* Group A/B/C MAPKs that contain the TEY motif in their activation loop.** Tobacco SIPK and WIPK, human ERK2 and P38 were also included in the tree. The numbers at the nodes indicate the bootstrap value. Rice MAPK nomenclature and accession numbers were the same as described in (Reyna and Yang, 2006). *Arabidopsis* MAPK accession numbers were the same as described in (MAPK-group, 2002). The Group D MAPKs, which contain the TDY motif in their activation loop, are schematically illustrated as triangles at the bottom. At, *Arabidopsis*; Os, rice. The alignment used to generate the phylogeny is shown in Supplemental Dataset 1.

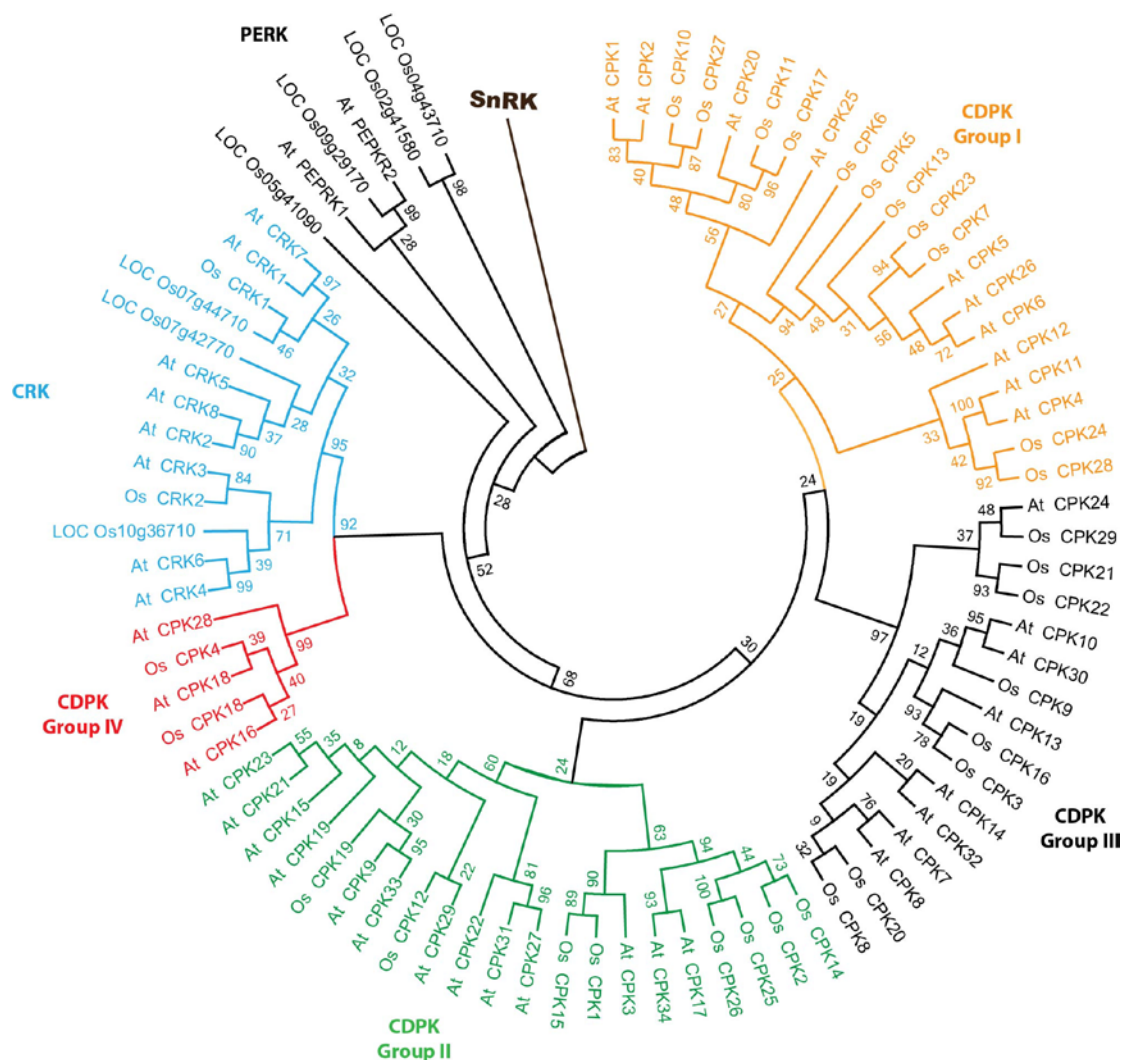

**Supplemental Figure 2. Phylogenesis of rice (*Os*) and *Arabidopsis* (*At*) CDPKs.** CDPKs were divided into four groups (Group I-IV). CRK, PEPRK and SnRK are the three plant protein kinase families closely related to CDPKs. CRK, CDPK-related kinase; PEPRK, phosphoenolpyruvate carboxylase kinase-related kinase; SnRK, SNF1-related kinase. The numbers at the nodes indicate the bootstrap value. The LOC\_Os indicates the locus ID of rice gene annotations (<http://rice.plantbiology.msu.edu/>). At, *Arabidopsis*; Os, rice. The alignment used to generate the phylogeny is shown in Supplemental Dataset 2.

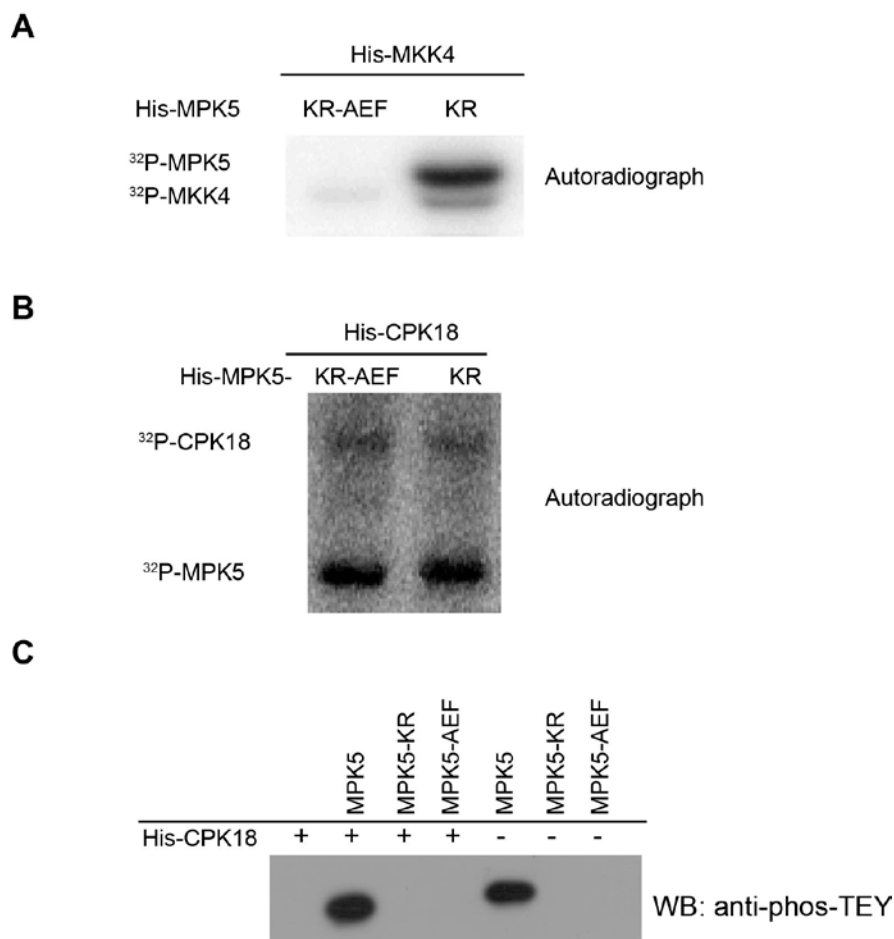

**Supplemental Figure 3. The MPK5 TEY motif is phosphorylated by MKK4 and autophosphorylation, but not by CPK18.** (A) MKK4 was capable of phosphorylating MPK5KR but not MPK5KR-AEF in which the TEY motif was substituted by AEF (MPK5KR-AEF). (B) CPK18 was capable of equally phosphorylating MPK5KR and MPK5KR-AEF. (C) Detection of the phos-TEY level of MPK5 after autophosphorylation (in the absence of CPK18) and phosphorylation by CPK18. MPK5KR and MPK5-AEF were used as negative controls in immunoblotting.

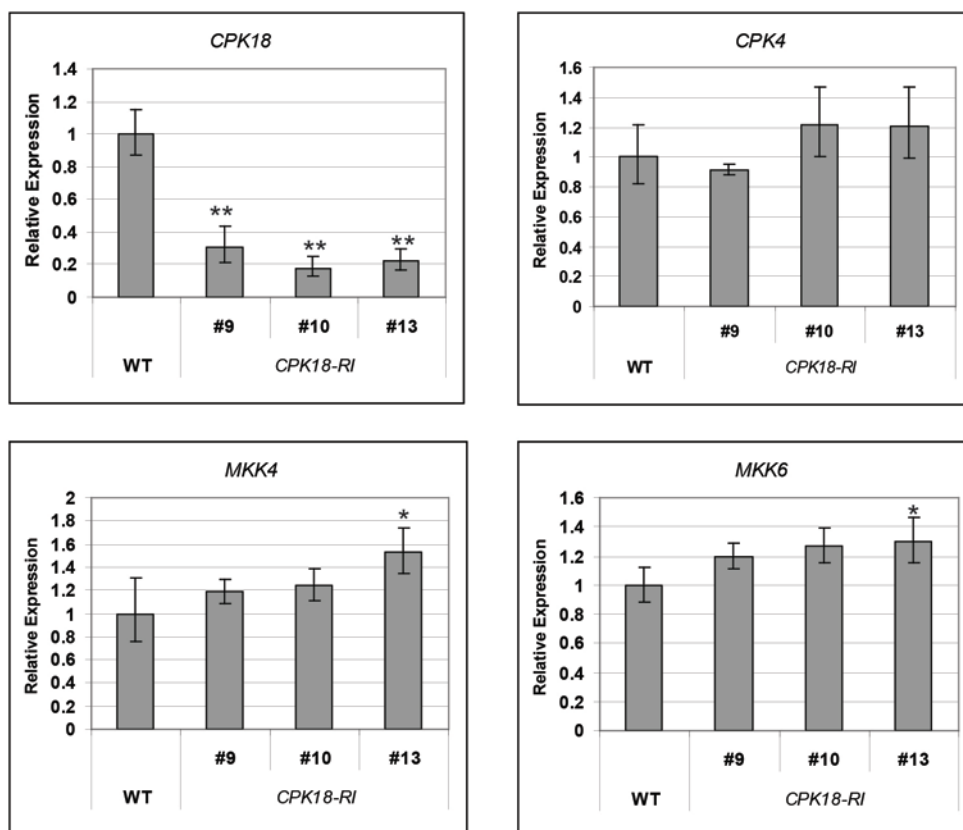

**Supplemental Figure 4. Expression of *CPK18*, *CPK4*, *MKK4* and *MKK6* in three *CPK18-RI* lines (9, 10, and 13).** The relative expression level of these genes was measured by RT-qPCR. Data presented as Mean  $\pm$  SD ( $n = 3$ ). Asterisks indicate statistically significant differences (\*  $p < 0.05$ ; \*\*  $p < 0.01$ , Student's  $t$ -test).

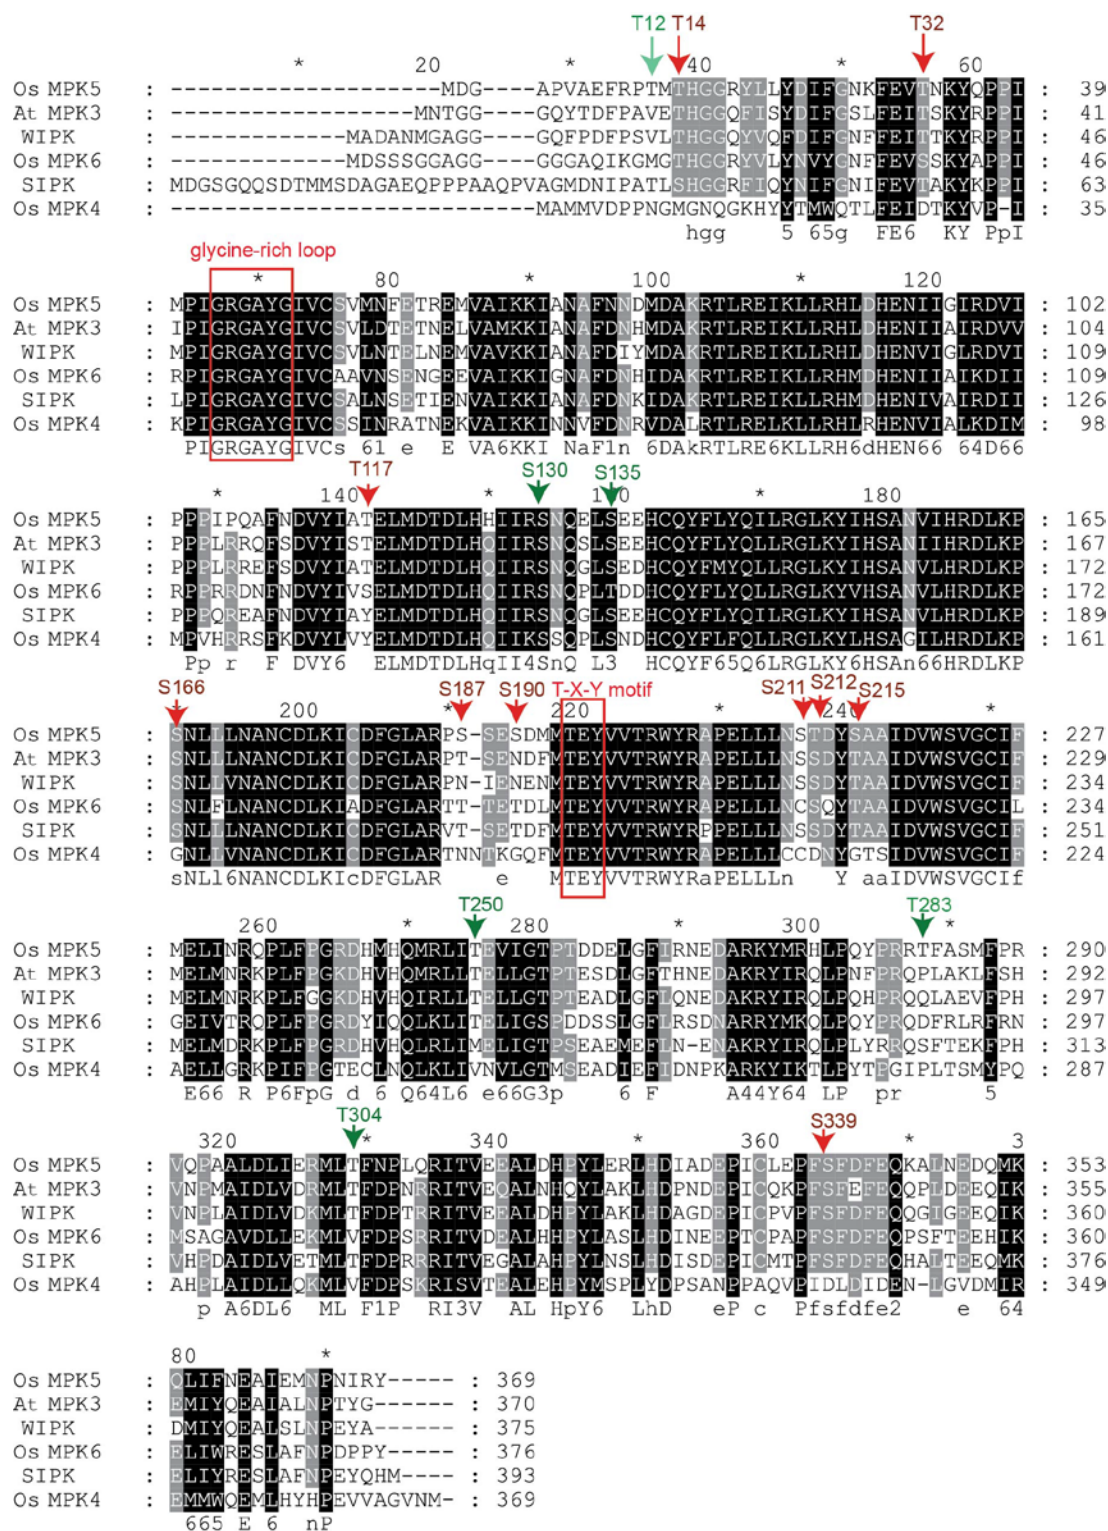

**Supplemental Figure 5. Prediction of CPK18 phosphorylated sites on MPK5.** Potential CPK18 phosphorylated residues on MPK5 were labelled with red arrows (predicted according to CPK18-MAPK phosphorylation specificity, see Figure 3) or blue arrows (predicted according to common CDPK phosphorylated motifs). The T-x-Y motif and ATP binding pocket (glycine-rich loop) were labelled with rectangles. The numbers and asterisks on the top indicate coordinates of aligned sequence. At, *Arabidopsis*; Os, rice.

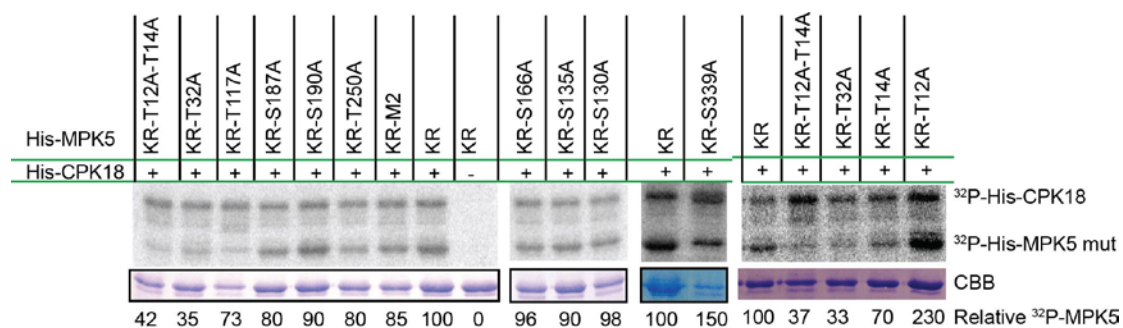

**Supplemental Figure 6. Mapping CPK18 phosphorylated sites on MPK5.** MPK5-KR-M2 possessed five substitutions including S211A, T212A, S215A, T283A, and T304A. The amount of mutated His-MPK5 proteins was shown by Coomassie Brilliant Blue (CBB) staining. The loadings of MPK5KR-T117A and MPK5KR-S339A were lower than others because of their poor solubility. The relative phosphorylation level (% to MPK5KR) of MPK5 mutant proteins was shown at the bottom.

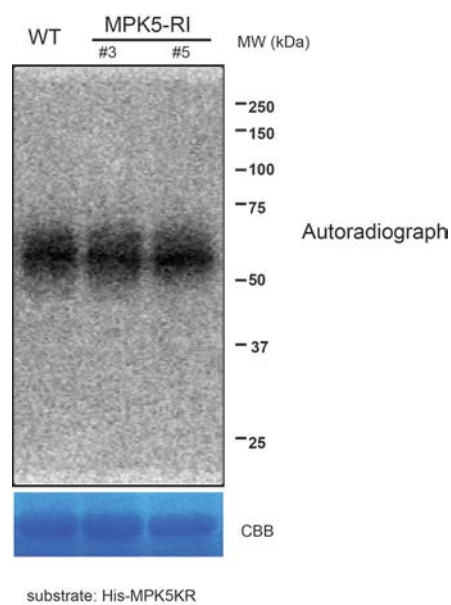

**Supplemental Figure 7. Native CPK18 activities in WT and MPK5-RI lines.** An in-gel kinase assay was performed to measure native CPK18 activities in WT and two MPK5-RI lines (#3 and #5). His-MPK5KR was used as substrate and embedded in SDS-PAGE.

**Supplemental Table 1 List of genes and DNA oligos used in this study****Genes and primers used in cloning**

| Gene                                  | Primer Name      | Primer Sequence (5'->3')         | Comment                 |
|---------------------------------------|------------------|----------------------------------|-------------------------|
| MPK5<br>(AF479883)                    | MPK5-ENTR-F      | CACC<br>GAATTCATGGACGGGGCGCCGGTG | TOPO Cloning            |
|                                       | MPK5-ENTR-R      | CTAGTACCG GAT GTT TGG GTT CAT    | With stop<br>codon      |
|                                       | MPK5-CF-R        | CCGGATGTTTGGGTTCA                | Without stop<br>codon   |
| CPK18<br>(AK121471)                   | CPK18-ENTR-F157  | CACC CAG CCG ACG ACG ATG GGA CT  | TOPO cloning            |
|                                       | CPK18-ENTR-R1703 | CGATCTGTGAACACTCCTCG             | Full length             |
|                                       | CPK18-ENTR-R1121 | TGC CTG TCC TCC TTC TCT CAC      | OsCPK18AC<br>constructs |
| CPK18                                 | CPK18-ENTR-F1364 | CACC GATTGTTGAGGCAATTGACAG       | RNAi<br>constructs      |
|                                       | CPK18-ENTR-R     | GGATCC AATGACTGCCCTTTGTTCA       |                         |
| CPK4<br>(AK060738)                    | CPK4-ENTR-F      | CACC ATGGGCGCGTGCTTCTCATC        | TOPO cloning            |
|                                       | CPK4-ENTR-R      | TCA CAG GGGTTGTGGATTTGGAG        |                         |
| CPK7<br>(AK066500)                    | CPK7-ENTR-F      | CACC ATGGGGAATCAGTGCCAGAA        | TOPO cloning            |
|                                       | CPK7-ENTR-R      | TCA ATG TACTTGAGGTGCGTCTC        |                         |
| MPK4<br>(AK071376)                    | MPK4-ENTR-F      | CACC ATGGCGATGATGGTGGACCC        | TOPO cloning            |
|                                       | MPK4-ENTR-R      | TCA CATATTCACCTCTGCAACAA         |                         |
| MPK6<br>(AK111579)                    | MPK6-ENTR-F      | CACC ATGGATTCCTCTCCGGCGG         | TOPO cloning            |
|                                       | MPK6-ENTR-R      | TTA AATGCCAAGGATTCCC             |                         |
| MKK4<br>(AK120525)                    | MKK4-ENTR-F99    | CACC GCCGTCGCG ATGCGACCGG        | TOPO cloning            |
|                                       | MKK4-ENTR-R1292  | TCCCACGTCTCAATGCCAAAC            |                         |
| <i>PR5</i><br>(AK241419)<br>promoter  | Pro-PR5-F        | CACCATGGAAGTTATATTACGTCTAC       | TOPO cloning            |
|                                       | Pro-PR5-R        | TAACAATTTACTCTACTATA             |                         |
| <i>Hin1</i><br>(AK068115)<br>promoter | Pro_Hin1-F       | CACC GCATGCATGTGGACCC            | TOPO cloning            |
|                                       | Pro_Hin1-R       | GATCGTAGCTAGTTGTGACAATT          |                         |

**Genes and primers used in qRT-PCR**

| Gene                       | Primer       | Primer Sequence (5'->3') |
|----------------------------|--------------|--------------------------|
| <i>CPK4</i><br>(AK060738)  | CPK4-qF1942  | TGCTGTTCTAGTCTCCCATTCTCC |
|                            | CPK4-qR2032  | CCCAGGCAACTTTATTGCGA     |
| <i>CPK18</i><br>(AK121471) | CPK18-qF1686 | AGGAGTGTTACAGATCGTAGC    |
|                            | CPK18-qR1802 | TTCTGGCAACAATTTTATTACAC  |
| <i>UBQ10</i>               | UBQ10-qF1447 | TGGTCAGTAATCAGCCAGTTTG   |



|                                |              |                          |
|--------------------------------|--------------|--------------------------|
| (AK101547)                     | UBQ10-qR1521 | CAAATACTTGACGAACAGAGGC   |
| MPK4<br>(AK071376)             | MPK4-qF1605  | GGCCACGTTTACACATATATTTGC |
|                                | MPK4-qR1666  | CCGCCCTAAAACCAAGCA       |
| MPK5<br>(AF479883)             | MPK5-F       | TCGAGCAGAAGGCTCTAAACG    |
|                                | MPK5-R       | CCGGATGTTTGGGTTTCATCT    |
| MPK6<br>(AK111579)             | MPK6-qF1102  | TTTGACCCAAGCAGACGGATA    |
|                                | MPK6-qR1163  | AGAGAAGCCAAGTATGGGTGATG  |
| <i>MKK4</i><br>(AK120525)      | MKK4-qF1266  | ACGGTGGTTTGGCATTGAG      |
|                                | MKK4-qR1327  | GAATACCCAAAATGGCTAGGAAGA |
| <i>MKK6</i><br>(AK059461)      | MKK6-qF1344  | TCTTGGTAGCGGCACATGTTC    |
|                                | MKK6-qR1407  | CCTCCCGAATTTCAACATCA     |
| <i>PR5</i><br>(AK241419)       | PR5-qF       | TACAACGTCGCCATGAGCTTCT   |
|                                | PR5-qR       | TGGGCAGAAGACGACTTGGTAGTT |
| <i>PR10</i><br>(D38170)        | PR10-qF      | TGGCATGCTCAAGATGATCGAGGA |
|                                | PR10-qR      | TTACTCTCACGGACTCAAACGCCA |
| <i>Chitinase</i><br>(AK104397) | CHI-qF830    | GTTTCATCTGGTCAGCGGATAGC  |
|                                | CHI-qR896    | CTGAGCCTTGGTCTCGTACTCA   |
| <i>Hin1</i><br>(AK068115)      | Hin1-qF      | ATTGACGTGTTTCGTGTCACTGAT |
|                                | Hin1-qR      | GTTCCAGCCGAGGAGTTC       |

### DNA oligos used for site-directed mutagenesis

| Gene | Oligo Name<br>(Gene-mutation) | Oligo for mutagenesis                   |
|------|-------------------------------|-----------------------------------------|
| MPK5 | MPK5-T12A                     | AGTTCAGGCCG GCG ATGACGCACGG             |
|      | MPK5-T14A                     | GGCCGACGATG GCG CACGGCGGC               |
|      | MPK5-T32A                     | GAACAAGTTCGAGGTGGCG AACAAGTACCAGCC      |
|      | MPK5-T117A                    | ACGTCTACATCGCC GCG GAGCTCATGGAC         |
|      | MPK5-S187A                    | TGGCGCGGCCG GCG TCGGAGAGC               |
|      |                               | ACCCGCGC CGG GCG TTCGCGAGC              |
|      | MPK5-S211A-T2<br>12A-S215A    | TGCTGCTCAACGCCGCGGACTACGCCGCCGCCAT<br>C |
|      | MPK5-S339A                    | GCCTGGAGCCCTTCGCCTTCGACTTCGAG           |
|      | MPK5-T250A                    | GATGCGCCTCATCGCCGAGGTGATCGG             |
|      | MPK5-S190A                    | GGCCGTCGTCGGAGGCCGACATGATGACGG          |
|      | MPK5-S188A                    | CGCGGCCGTCGGCGGAGAGCGAC                 |
|      | MPK5-T304A                    | TCGAGAGGATGCTCGCCTTCAACCCGCTG           |
|      | MPK5-K65R                     | GAGATGGTGGCGATAAGGAAGATCGCCAACGC        |
|      | MPK5-T194A                    | GAGAGCGACATGATGGCGGAGTACGTGGTCA         |

|       |                    |                                             |
|-------|--------------------|---------------------------------------------|
|       | MPK5-T194A-E-Y196F | GAGCGACATGATGGCGGAGTTCGTGGTCACCCGG          |
|       | MPK5-T14D          | TTCAGGCCGACGATGGATCACGGCGGCCGTAC            |
|       | MPK5-T32D          | GGGAACAAGTTCGAGGTGGATAACAAGTACCAGC<br>CGCCC |
| CPK18 | CPK18 (D178A)      | GGTTTGGTTCATCGGGCCATGAAGCCTGAGAAC           |
